# Supplementary material for: Efficacy and Safety of Angiotensin Receptor Blockers in a Pre-Clinical Model of Arrhythmogenic Cardiomyopathy
Source: MDPI journal article supplement (doi:10.3390/ijms232213909), 2022-11-11
Supplement: s1 [file s1]

### Supplementary Figure:

**Supplementary Figure S1. *Dsg2<sup>mut/mut</sup>* time course of disease. [3]**

**Supplementary Figure S2. mRNA transcription levels and echocardiography analysis of WT vehicle and *Dsg2<sup>mut/mut</sup>* mice treated with ARBs. (A) Percent left ventricular ejection fraction (%LVEF). (B) Percent fractional shortening (%FS). (C) RWT, relative wall thickness; (D) LVM, left ventricular mass. qPCR analysis of genes associated with (E) metabolism and (F) lipids and lipids carriers. Data presented as mean±SEM. \*P<0.05 for any cohort vs WT Vehicle; †P<0.05 any Rosiglitazone-treated cohort vs vehicle-treated *Dsg2<sup>mut/mut</sup>* mice; #P<0.05 Rosiglitazone-treated WT vs Rosiglitazone-treated *Dsg2<sup>mut/mut</sup>* mice using One-way ANOVA with Tukey's post-hoc analysis.**

### Supplementary Tables:

**Supplementary Table S1. Echocardiographic, electrocardiographic, blood pressure plethysmography, and morphometric indices from Vehicle- and Drug-treated WT and *Dsg2<sup>mut/mut</sup>* mice at 8 weeks of age. IVSd, interventricular septal end-diastolic volume; IVSs, interventricular septal end-systolic volume; LVIDd, left ventricular internal diameter end-diastolic volume; LVIDs, left ventricular internal diameter end-systolic volume; LVPWd, left ventricular posterior wall end diastole; LVPWs, left ventricular posterior wall end systole; FS, fractional shortening; EF, ejection fraction; HR, heart rate; RR-I, R-R interval; PR-I, P-R interval; Pd, P-wave duration; QRSd, QRS duration interval; Q-Amp, Q-wave amplitude; S-Amp, S-wave amplitude; PVC, premature ventricular contraction; BPP, blood pressure plethysmography; SBP, systolic blood pressure; DBP, diastolic blood pressure; MBP, mean blood pressure; RWT, relative wall thickness; LVM, left ventricular mass. Data presented as mean±SEM, \*P<0.05 for any cohort vs WT Vehicle; †P<0.05 any drug-treated *Dsg2<sup>mut/mut</sup>* cohort vs vehicle-treated *Dsg2<sup>mut/mut</sup>* mice; &p<0.05 for *Dsg2<sup>mut/mut</sup>* mice treated with Valsartan vs *Dsg2<sup>mut/mut</sup>* mice treated with Telmisartan using Student's t-test or One-way ANOVA with Tukey's post-hoc analysis.**

**Supplementary Table S2: Real-time PCR run protocol and forward and reverse primer sequences.**

Supplementary Figure S1

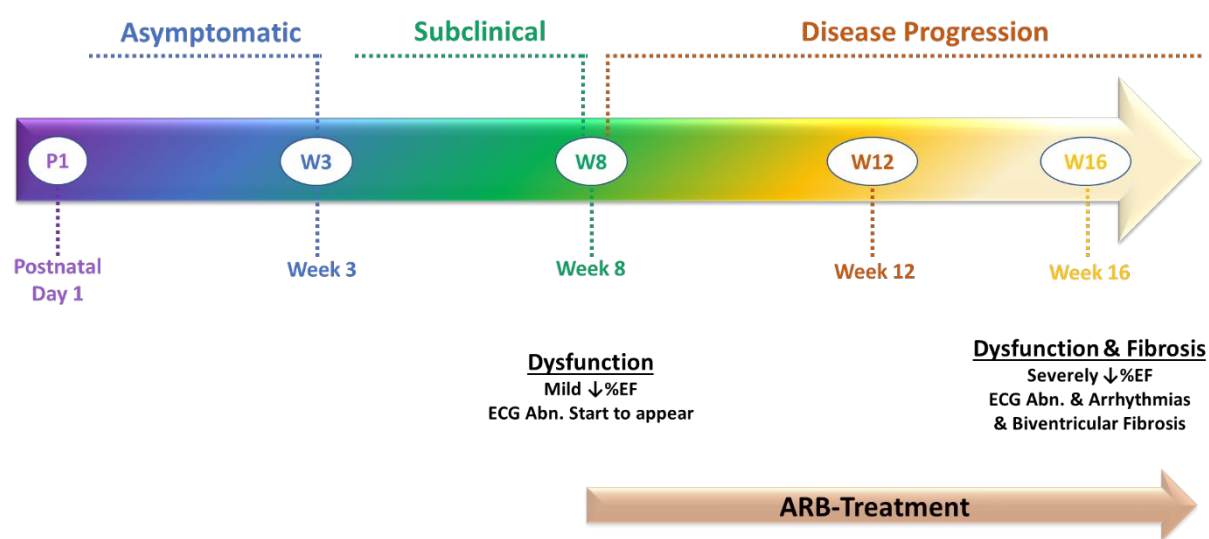

Supplementary Figure S2

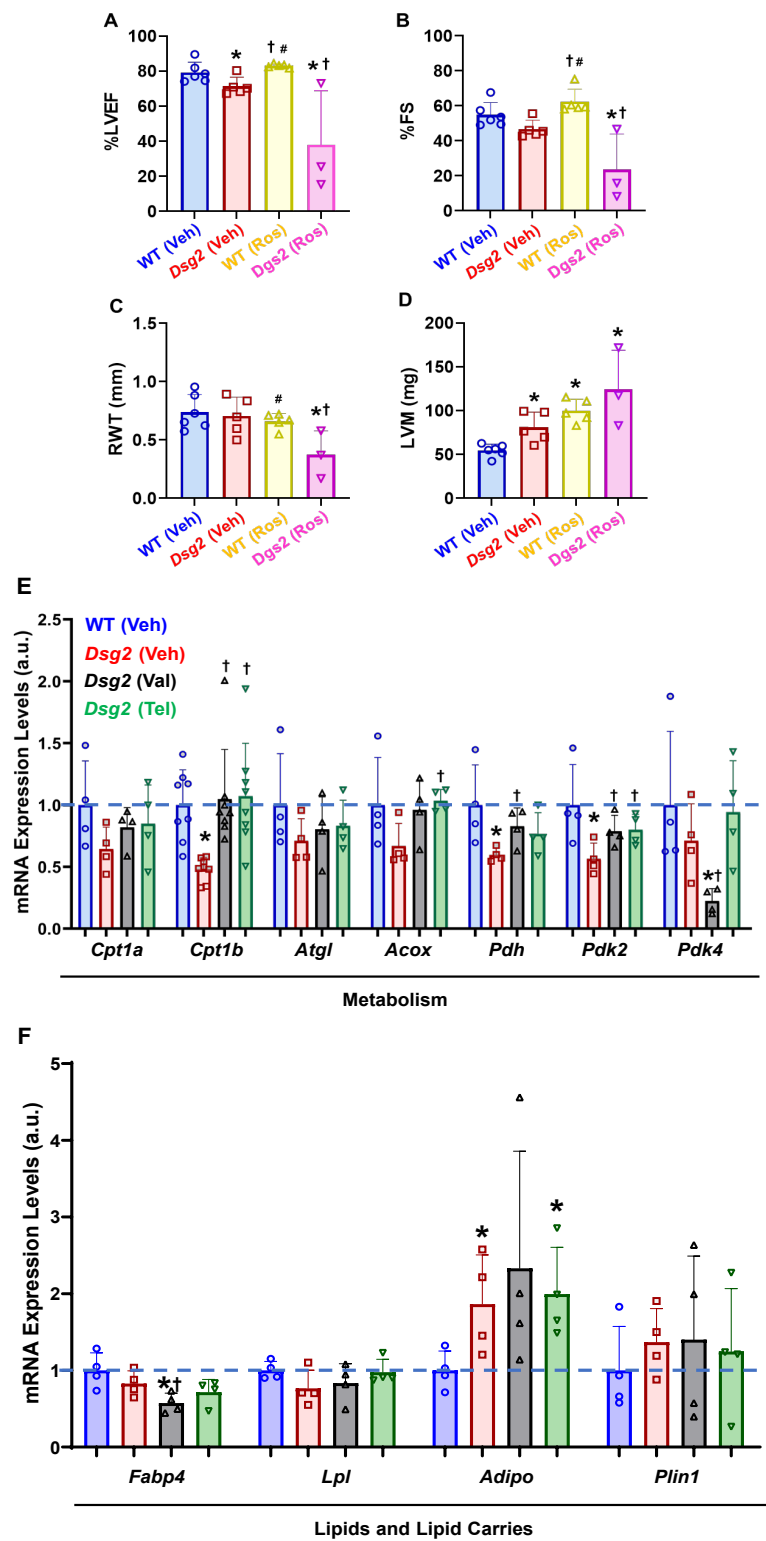

Supplementary Table S1

| Parameters          | Vehicle      |                                | Valsartan (30mg/kg/day) |                                | Telmisartan (10mg/kg/day) |                                |
|---------------------|--------------|--------------------------------|-------------------------|--------------------------------|---------------------------|--------------------------------|
|                     | WT           | <i>Dsg2</i> <sup>mut/mut</sup> | WT                      | <i>Dsg2</i> <sup>mut/mut</sup> | WT                        | <i>Dsg2</i> <sup>mut/mut</sup> |
| <b>Echo</b>         |              |                                |                         |                                |                           |                                |
| <i>n</i>            | 6            | 5                              | 5                       | 5                              | 4                         | 6                              |
| IVSd (mm)           | 0.85 ± 0.03  | 0.98 ± 0.06*                   | 0.83 ± 0.04             | 0.82 ± 0.06                    | 0.79 ± 0.15               | 0.79 ± 0.08*†                  |
| IVSs (mm)           | 1.44 ± 0.07  | 1.37 ± 0.11                    | 1.28 ± 0.07*            | 1.21 ± 0.07*†                  | 1.36 ± 0.12               | 1.21 ± 0.06                    |
| LVIDd (mm)          | 2.32 ± 0.12  | 2.66 ± 0.18*                   | 2.15 ± 0.29             | 2.74 ± 0.31                    | 2.44 ± 0.19               | 2.62 ± 0.23                    |
| LVIDs (mm)          | 1.05 ± 0.11  | 1.41 ± 0.05*                   | 0.78 ± 0.14*            | 1.55 ± 0.31*                   | 1.22 ± 0.19               | 1.24 ± 0.18                    |
| LVPWd (mm)          | 0.84 ± 0.05  | 0.92 ± 0.06                    | 0.93 ± 0.09             | 0.81 ± 0.06&                   | 0.81 ± 0.11               | 0.60 ± 0.04*†                  |
| LVPWs (mm)          | 0.97 ± 0.08  | 1.04 ± 0.04                    | 1.20 ± 0.10*            | 1.06 ± 0.03&                   | 0.90 ± 0.20               | 0.78 ± 0.10†                   |
| FS (%)              | 54.9 ± 3.1   | 46.7 ± 2.6*                    | 64.1 ± 3.1*             | 44.9 ± 4.5*                    | 50.1 ± 5.6                | 53.4 ± 4.0                     |
| EF (%)              | 79.3 ± 2.6   | 71.4 ± 2.6*                    | 86.8 ± 2.1*             | 69.0 ± 5.4*                    | 74.4 ± 5.3                | 77.7 ± 3.4                     |
| <b>ECG</b>          |              |                                |                         |                                |                           |                                |
| HR (bpm)            | 433 ± 20     | 498 ± 14*                      | 462 ± 6                 | 506 ± 28*                      | 468 ± 23                  | 507 ± 10*                      |
| RR-I (ms)           | 139 ± 6.3    | 121 ± 3.9*                     | 129 ± 2.0               | 120 ± 6.7*                     | 129 ± 5.6                 | 119 ± 2.4*                     |
| PR-I (ms)           | 36.4 ± 2.2   | 36.7 ± 0.5                     | 39.3 ± 0.6              | 40.1 ± 1.9†                    | 34.5 ± 3.4                | 36.0 ± 2.0                     |
| Pd (ms)             | 11.2 ± 0.8   | 8.3 ± 0.5*                     | 11.5 ± 0.7              | 9.8 ± 0.8†                     | 8.03 ± 0.2*               | 11.8 ± 1.0†                    |
| QRS-d (ms)          | 10.4 ± 0.6   | 10.3 ± 0.9                     | 11.5 ± 0.4              | 12.7 ± 2.3                     | 11.7 ± 3.3                | 18.3 ± 2.8*†                   |
| Q-Amp (mV)          | -0.01 ± 0.01 | -0.07 ± 0.05                   | -0.02 ± 0.0             | -0.12 ± 0.06*                  | -0.00 ± 0.0               | -0.21 ± 0.04*†                 |
| S-Amp (mV)          | -0.14 ± 0.05 | -0.11 ± 0.04                   | -0.21 ± 0.07            | -0.01 ± 0.03*†                 | -0.16 ± 0.06              | -0.04 ± 0.01*†                 |
| PVCs (%)            | 0.0 ± 0.0    | 0.34 ± 0.24                    | 0.04 ± 0.05             | 0.22 ± 0.09*&                  | 0.53 ± 0.22*              | 11.3 ± 4.2*†                   |
| <b>BPP</b>          |              |                                |                         |                                |                           |                                |
| SBP (mmHg)          | 114 ± 7.7    | 132 ± 9.9                      | 105 ± 2.6               | 114 ± 7.7†&                    | 89.8 ± 5.9*               | 85.4 ± 2.5*†                   |
| DBP (mmHg)          | 64.6 ± 6.3   | 77.0 ± 10.1                    | 58.4 ± 5.4              | 64.6 ± 10.2&                   | 42.0 ± 1.8*               | 40.4 ± 1.5*†                   |
| MBP (mmHg)          | 81.2 ± 6.5   | 95.2 ± 10.0                    | 74.0 ± 3.8              | 81.4 ± 9.2&                    | 58.0 ± 2.4*               | 55.4 ± 1.0*†                   |
| <b>Morphometric</b> |              |                                |                         |                                |                           |                                |
| RWT (mm)            | 0.74 ± 0.07  | 0.71 ± 0.08                    | 0.97 ± 0.26             | 0.62 ± 0.08&                   | 0.69 ± 0.15               | 0.47 ± 0.04*†                  |
| LVM (mg)            | 54.6 ± 3.2   | 80.9 ± 8.7*                    | 53.2 ± 7.3              | 68.0 ± 12.4                    | 54.0 ± 7.8                | 49.9 ± 7.4†                    |

Supplementary Table S2

| mRNA gene Transcript              | Forward Primer Sequence  | Reverse Primer Sequence | qPCR Run Protocol                                                                                                                                                       |
|-----------------------------------|--------------------------|-------------------------|-------------------------------------------------------------------------------------------------------------------------------------------------------------------------|
| <i>Cptb1a</i>                     | GGCATAAACGCAGAGCATTCTG   | CAGTGTCCATCCTCTGAGTAGC  | <p><b>Step 1:</b><br/>95°C for 3mins</p> <p><b>Step 2:</b><br/>95°C for 10secs</p> <p><b>Step 3:</b><br/>60°C</p> <p><b>Step 4:</b><br/>Go to Step 2 and repeat 60x</p> |
| <i>Cptb1b</i>                     | CCAAGATCTGCTCCTACCACG    | ACAGATAGCCGACGTTTGGAA   |                                                                                                                                                                         |
| <i>Atgl</i>                       | TCCGAGAGATGTGCAAACAG     | TTGGTTCAGTAGGCCATTCC    |                                                                                                                                                                         |
| <i>Acox</i>                       | GCCATTCGATACAGTGCTGTGAG  | CCCAGAAAGTGGAAGGCATAGG  |                                                                                                                                                                         |
| <i>Pdh-E1<math>\alpha</math>1</i> | GGTGGTGTGGTCCTAGCTGT     | ATTCCTGGTGGCTGCTACAC    |                                                                                                                                                                         |
| <i>Pdk2</i>                       | CTGGACCGCTTCTACCTCAG     | GCCATCAAAGATGAGGGTGT    |                                                                                                                                                                         |
| <i>Pdk4</i>                       | GCCTTGGGAGAAATGTGTGT     | TGCTTTGATTCCTTCCATCC    |                                                                                                                                                                         |
| <i>PPAR<math>\alpha</math></i>    | AGTTCACGCATGTGAAGGCT     | AGCTCCGATCACACTTGTCG    |                                                                                                                                                                         |
| <i>PPAR<math>\delta</math></i>    | GGACCAGAACACACGCTTCCTT   | CCGACATTCCATGTTGAGGCTG  |                                                                                                                                                                         |
| <i>PPAR<math>\gamma</math></i>    | GTA CTGTCGGTTTCAGAAGTGCC | ATCTCCGCCAACAGCTTCTCCT  |                                                                                                                                                                         |
| <i>CEBPa</i>                      | AGTCGGTGGACAAGAACAGC     | ACGTTGCGTTGTTTGGCTTT    |                                                                                                                                                                         |
| <i>CEBPb</i>                      | CAAGCTGAGCGACGAGTACA     | TCAGCTCCAGCACCTTGTG     |                                                                                                                                                                         |
| <i>PGC1<math>\alpha</math></i>    | GAATCAAGCCACTACAGACACCG  | CATCCCTCTTGAGCCTTTTCGTG |                                                                                                                                                                         |
| <i>PGC1b</i>                      | CAGCCTCAGTTCCAGAAGTCAG   | CACCGAAGTGAGGTGCTTATGC  |                                                                                                                                                                         |
| <i>Ctnnb1</i>                     | GTTTCGCCTTCATTATGGACTGCC | ATAGCACCTGTTCCCGCAAAG   |                                                                                                                                                                         |
| <i>Fabp4</i>                      | TGAAATCACCGCAGACGACAGG   | GCTTGTCACCATCTCGTTTTCTC |                                                                                                                                                                         |
| <i>Lpl</i>                        | GCGTAGCAGGAAGTCTGACCAA   | AGCGTCATCAGGAGAAAGGCGA  |                                                                                                                                                                         |
| <i>Adipo</i>                      | AGATGGCACTCCTGGAGAGAAG   | ACATAAGCGGCTTCTCCAGGCT  |                                                                                                                                                                         |
| <i>Plin1</i>                      | GCCACTCCA ACTCCAAATGT    | GCACTGCTAGGCCAGTTTTTC   |                                                                                                                                                                         |
| <i>GAPDH</i>                      | CATCACTGCCACCCAGAAGACTG  | ATGCCAGTGAGCTTCCCGTTCAG |                                                                                                                                                                         |
